1 **The color pattern inducing gene *wingless* is expressed in specific cell types of**  
2 **campaniform sensilla of a polka-dotted fruit fly, *Drosophila guttifera***

3

4 **Masato Koseki<sup>1</sup>, Nobuaki K. Tanaka<sup>2,3</sup>, Shigeyuki Koshikawa<sup>1,4</sup>**

5

6 <sup>1</sup>Hokkaido University, Graduate School of Environmental Science

7 <sup>2</sup>Hokkaido University, Faculty of Science

8 <sup>3</sup>Hokkaido University, Graduate School of Life Science

9 <sup>4</sup>Hokkaido University, Faculty of Environmental Earth Science

10

11 NKT: ORCID iD: 0000-0001-6256-4571

12 SK: ORCID iD: 0000-0003-2831-555X

13

14 Key words: mechanoreceptor, pigmentation, tormogen cell, trichogen cell, Fast Red, dual  
15 detection

16

17 Corresponding author: Shigeyuki Koshikawa email: [koshi@ees.hokudai.ac.jp](mailto:koshi@ees.hokudai.ac.jp)

18

19 **Abstract**

20 A polka-dotted fruit fly, *Drosophila guttifera*, has a unique pigmentation pattern on its wings  
21 and is used as a model for evo-devo studies exploring the mechanism of evolutionary gain of  
22 novel traits. In this species, a morphogen-encoding gene, *wingless*, is expressed in species-  
23 specific positions and induces a unique pigmentation pattern. To produce some of the  
24 pigmentation spots on wing veins, *wingless* is thought to be expressed in developing  
25 campaniform sensilla cells, but it was unknown which of the four cell types there express(es)  
26 *wingless*. Here we show that two of the cell types, dome cells and socket cells, express  
27 *wingless*, as indicated by *in situ* hybridization together with immunohistochemistry. This is a  
28 unique case in which non-neuronal SOP (sensory organ precursor) progeny cells produce  
29 Wingless as an inducer of pigmentation pattern formation. Our finding opens a path to  
30 clarifying the mechanism of evolutionary gain of a unique *wingless* expression pattern by  
31 analyzing gene regulation in dome cells and socket cells.

## 32 Introduction

33 Animal color patterns are an example of the morphological diversity of organisms.  
34 Ecological roles of color patterns have been studied (Cott 1940), and another major issue  
35 regarding color patterns is their formation process. In particular, color pattern formation of  
36 insects has been investigated to gain insight into the relationship between regulation of gene  
37 expression and morphological evolution. As a result of studies to elucidate the process of  
38 pattern formation, patterning genes whose expression induces the color formation have been  
39 identified. For example, the pattern of *optix* expression determines the position of red  
40 pigmentation in adult wings of *Heliconius* butterflies (Reed et al. 2011; Martin et al. 2014;  
41 Zhang et al. 2017), *WntA* expression determines the border of pigmentation in adult wings of  
42 Nymphalidae butterflies (Martin et al. 2012; Martin and Reed 2014; Mazo-Vargas et al.  
43 2017), and *pannier* expression determines the aposematic color pattern in the adult ladybird  
44 beetles (Ando et al. 2018; Gautier et al. 2018). Interestingly, these genes are also expressed  
45 during ontogenesis. This indicates an evolutionary process in which genes with roles in  
46 ontogenesis were co-opted for color pattern formation (Jiggins et al. 2017). In order to  
47 examine in detail the evolutionary process that produces color patterns, it is necessary to  
48 elucidate the mechanism of spatiotemporal regulation of patterning genes (Fukutomi and  
49 Koshikawa 2021).

50 Various pigmentation patterns are found in adult wings of *Drosophila* fruit flies  
51 (Insecta, Diptera, Drosophilidae) (Wittkopp et al. 2002; Massey and Wittkopp 2016; Dufour  
52 et al. 2020; Koshikawa 2020; Werner et al. 2020). Adult *Drosophila guttifera* flies have a  
53 species-specific wing spot pattern (Fig. 1A). The spots occur at specific positions, such as  
54 around campaniform sensilla on wing veins (Werner et al. 2010; Koshikawa et al. 2015;  
55 Fukutomi et al. 2017; Fukutomi et al. 2021). The spot formation around campaniform sensilla  
56 is a suitable model for examining the spatiotemporal regulation of the patterning gene  
57 (Koshikawa et al. 2017). This formation is induced by the species-specific expression of the  
58 patterning gene *wingless* (*wg*) during the pupal stage (Fig. 1C; Werner et al. 2010;  
59 Koshikawa et al. 2015). *wg* is expressed at campaniform sensilla on wing veins of *D.*  
60 *guttifera* (Fig 1C), and this expression is not detected in other *Drosophila* species  
61 (Koshikawa et al. 2015). The expression begins at mid-pupa (late stage 6) and then induces  
62 the subsequent expression of pigmentation genes such as *yellow* (Werner et al. 2010). In *D.*  
63 *melanogaster*, Each campaniform sensillum, which is a mechanoreceptor involved in flight  
64 control by sensing wing flexion (Tuthill and Wilson 2016), consists of four differentiated  
65 cells: a socket (tormogen) cell, a dome (trichogen) cell, a sheath (thecogen) cell, and a neuron

66 (Fig. 1B; Van De Bor et al. 2000; Van De Bor et al. 2001). The formation of a campaniform  
67 sensillum resembles that of a bristle, a type of mechanoreceptor. The sensory organ precursor  
68 (SOP) selected from a proneural cluster (Furman and Bukharina 2008; Gómez-Skarmeta et  
69 al. 1995) divides into the two secondary precursors, P II a and P II b (Van De Bor et al. 2000;  
70 Van De Bor and Giangrande 2001). The socket and dome cells are generated by the division  
71 of the P II a, and the sheath cell and neuron are generated by the division of the tertiary  
72 precursor P III b, which is a progeny of the P II b (Van De Bor et al. 2000; Van De Bor and  
73 Giangrande 2001). Subsequently, the differentiation process of each of these cells follows  
74 (Furman and Bukharina 2008), but the detailed gene expression profiles involved in the  
75 differentiation have not been well investigated. The expression of the patterning gene *wg*  
76 begins during the differentiation stage of the four cells of the campaniform sensilla in *D.*  
77 *guttifera* (Werner et al. 2010), indicating that the cell differentiation and *wg* expression are  
78 synchronized. Understanding the relationships between campaniform sensilla differentiation  
79 and *wg* expression is a key for unravelling the process of evolutionary gain of species-  
80 specific *wg* expression.

81 Proteins of the Wnt family, including Wingless (Wg) protein, are involved in the  
82 formation of structures characteristic of the neuronal network, such as synapses and axons  
83 (Packard et al. 2002; He et al. 2018). Considering that *wg* may be expressed in neurons in  
84 general, although *wg* is not expressed at campaniform sensilla of *D. melanogaster*, it is  
85 possible that co-option of *wg* expression occurs in neurons of campaniform sensilla of *D.*  
86 *guttifera*. Here, as the first step to elucidate the relationships between the differentiation of  
87 cells composing campaniform sensilla and the pigmented spot formation, we investigated  
88 whether neurons express the patterning gene *wg*, and if not, which cells express *wg*. The  
89 identification was performed by the dual detection of *wg* transcripts by *in situ* hybridization  
90 and of specific marker protein or cell membrane of campaniform sensilla by  
91 immunohistological staining in pupal wings.

92

### 93 **Materials and methods**

#### 94 Flies and genomic DNA

95 We used *D. melanogaster* Oregon-R (wild-type) and *D. guttifera* (stock no. 15130-  
96 1971.10, obtained from the *Drosophila* Species Stock Center at the University of California,  
97 San Diego), for genomic DNA preparation and gene expression analysis. Both fly lines were

98 reared on standard food containing cornmeal, sugar, yeast, and agar at room temperature  
99 (Fukutomi et al. 2018).

100

#### 101 Dissection and Fixation

102 Dissection of pupal wings was performed as described previously (Werner et al.  
103 2010). After the pupal membrane was removed, pupal wings were fixed in PBS (phosphate  
104 buffered saline, Takara Bio) with 4% paraformaldehyde (PFA) for 20 minutes (min) at room  
105 temperature. Fixed samples were washed three times in PBT (0.1% Triton X-100 in PBS) and  
106 stored in methanol at -20°C.

107

#### 108 Immunohistochemistry

109 Stored wing samples were incubated with primary antibodies in PBT overnight at  
110 4°C. Following three washes with PBT, samples were incubated with fluorescent secondary  
111 antibodies in PBT for 2 h at room temperature and washed three times with PBT. After the  
112 last PBT wash, samples were mounted with Vectashield Mounting Medium with DAPI  
113 (Vector Laboratories). Each wash was 5 min long. The following primary antibodies were  
114 used at the indicated dilutions: mouse anti-Cut, 1:1000 [2B10; Developmental Studies  
115 Hybridoma Bank (DSHB)]; mouse anti-Elav (Embryonic lethal abnormal vision), 1:1000  
116 (9F8A9, DSHB); mouse anti-Futsch, 1:1000 (22C10; DSHB); mouse anti-Na<sup>+</sup>/K<sup>+</sup>-ATPase $\alpha$   
117 (Chicken homolog of *Drosophila* Atpa), 1:50 (a5; DSHB). For secondary antibodies, anti-  
118 mouse-Alexa555 conjugate (Abcam) or anti-mouse-Alexa488 conjugate (Abcam) was used at  
119 1:500.

120

#### 121 *In situ* hybridization

122 Digoxigenin-labeled antisense RNA probes of *wg* and *Suppressor of Hairless*  
123 [*Su(H)*] were produced as described previously (Werner et al. 2010). Genomic DNA was  
124 extracted by using a DNeasy Blood & Tissue Kit (QIAGEN). The following forward and  
125 reverse primers were used to amplify a 377 bp DNA fragment of *wg* exon 2 in *D. guttifer*:  
126 5'-CACGTTTCAGGCGGAGATGCG-3' and 5'-GGCGATGGCATATTGGGATGATG-3', a  
127 525 bp DNA fragment of *Su(H)* exon 2 in *D. guttifer*: 5'-CAGTGATCAGGATATGCAGC-  
128 3' and 5'-TGCGAAACAGGATCATCAGC-3', and a 402 bp DNA fragment of *Su(H)* exon 2  
129 in *D. melanogaster*: 5'-AGCTGGATCTCAATGGCAAG-3' and 5'-  
130 CATTATTACGGAGCCACAG-3'. DNA fragments were cloned into pGEM-T Easy

131 Vector (Promega). DNA templates for *in vitro* transcription were amplified using M13F and  
132 M13R primers. RNA probes were transcribed *in vitro* with T7 or SP6 polymerase (Promega)  
133 and DIG (Digoxigenin) RNA Labeling Mix (Roche). Each probe was purified using a  
134 ProbeQuant G-50 Micro Column (Cytiva) and stored in RNase-free water at -20°C. Stored  
135 wing samples were treated with methanol containing 2% H<sub>2</sub>O<sub>2</sub> for 20 min at room  
136 temperature, as described previously (Lauter et al. 2011). Then they were washed twice with  
137 ethanol, incubated in a mixture of xylene and ethanol (1:1 v/v) for 60 min, washed three  
138 times with ethanol, and rehydrated by two washes with methanol and two washes with PBT.  
139 After treatment with a mixture of acetone and PBT (4:1 v/v) for 14 min at -20°C, samples  
140 were washed twice with PBT, post-fixed in PBS with 4% PFA for 20 min and washed three  
141 times with PBT. The fixation in acetone was performed with reference to Nagaso et al.  
142 (2001). The hybridization process and anti-DIG antibody incubation were performed as  
143 described previously (Sturtevant et al. 1993, Werner et al. 2010), except that the  
144 hybridization buffer contained 5% dextran sulfate and the hybridization temperature was  
145 57°C. Signals of transcripts were detected using Anti-DIG-AP (alkaline phosphatase) and Fab  
146 fragments from sheep (Roche) and developed in Fast Red TR and naphthol-AS-MX-  
147 phosphate in 0.1 M Tris-HCl pH 8.2 (tablet set; Sigma). After three washes with PBT,  
148 samples were mounted in PBT or 50% glycerol diluted with PBS.

149

#### 150 Dual detection

151 The pretreatment and hybridization processes were performed as described above.  
152 After washes with PBT, hybridized wings were incubated with Anti-DIG-AP Fab fragments  
153 (Roche) diluted 1:6000 and primary antibodies in Pierce Immunostain Enhancer (PIE)  
154 (Thermo Scientific) overnight at 4°C. Then they were washed three times with PBT,  
155 incubated with fluorescent secondary antibodies in PIE for 2 h at room temperature and  
156 washed three times with PBT. Detection of transcripts, subsequent washes, and mounting  
157 were performed as described in the “*In situ* hybridization” section.

158

#### 159 Microscopy and image analysis

160 Preparations were observed using a BX60 microscope (Olympus) or an LSM700  
161 confocal microscope (Carl Zeiss). Confocal images were taken at z-intervals of 0.4 μm. The  
162 brightness, contrast, and color of images were adjusted with Fiji (Schindelin et al. 2012).

163

164 **Results and discussion**

165 Comparison of gene expression patterns in pupal wings of *D. melanogaster* and *D. guttifer*

166 We first investigated whether *cut*, *futsch*, *embryonic lethal abnormal vision (elav)*,  
167 and *Suppressor of Hairless [Su(H)]* are expressed in the campaniform sensilla on pupal wings  
168 of *D. guttifer* (Fig. 1). These are marker genes expressed in the cells of sensilla in *D.*  
169 *melanogaster*. Cut protein (Blochliger et al. 1990; 1993) is localized in the nuclei of all four  
170 types of cells composing campaniform sensilla during the developmental stages in *D.*  
171 *melanogaster* (Van De Vor et al. 2000). Futsch, also known as the antigen of 22C10  
172 antibodies, and Elav proteins are localized in the cytoplasm and nucleus of neurons,  
173 respectively (Fig. 1F, H; Hummel et al. 2000; Aigouy et al. 2004; Robinow and White 1988;  
174 Van De Bor et al. 2000). *Su(H)* is a gene specifically expressed in the socket cells composing  
175 bristles of *D. melanogaster* (Barolo et al. 2000).

176 In *D. melanogaster*, we found that Cut expression was observed in the sensilla of the  
177 wing margin, the third longitudinal vein, and the anterior cross vein of pupal wings (Fig. 1D).  
178 The magnified image of L3-1 (Fig. 1D') shows four cells with a high level of accumulation  
179 of Cut, as in other campaniform sensilla of the third longitudinal vein (L3-2 and L3-3). In *D.*  
180 *guttifer*, Cut was localized in the campaniform sensillum on the fifth longitudinal vein (L5)  
181 in addition to the third longitudinal vein (Fig. 1E). This is in accord with the previous report  
182 that there is a campaniform sensillum on the fifth longitudinal vein in the wing of *D. guttifer*  
183 (Sturtevant 1921), but not in *D. melanogaster*. In a magnified view of the *D. guttifer* wing  
184 (L3-1, Fig 1E'), four cells containing a high level of Cut protein are seen, as in *D.*  
185 *melanogaster*, indicating that a campaniform sensillum of *D. guttifer* also consists of four  
186 types of cells.

187 Futsch protein, also known as 22C10 antigen, was detected throughout the  
188 cytoplasm of neurons in *D. melanogaster* (Fig. 1F; Hummel et al. 2000; Aigouy et al. 2004).  
189 A similar pattern of Futsch localization in pupal wings was observed in *D. guttifer* (Fig.  
190 1G). Elav protein is localized in nuclei of neurons of *D. melanogaster* (Fig. 1H; Robinow and  
191 White 1988; Van De Bor et al. 2000). A similar pattern of Elav localization in pupal wings  
192 was observed in *D. guttifer* (Fig. 1I), suggesting that Elav is localized in nuclei of neurons  
193 of *D. guttifer*. In summary, there was no substantial difference in the morphology or  
194 position of neurons in pupal wings between the two species.

195 The expression of *Su(H)* was detected at the estimated position of the campaniform  
196 sensilla in *D. melanogaster* (Fig. 1J), suggesting that the socket cells composing the  
197 campaniform sensilla of *D. melanogaster* express *Su(H)*. Similarly, the expression of *Su(H)*

198 was observed in the campaniform sensilla of *D. guttifer* (Fig. 1K). This indicates that the  
199 position of socket cells in pupal wings of *D. guttifer* can be visualized by detecting the  
200 expression of *Su(H)*. However, it was unknown whether the detection of *Su(H)* could  
201 visualize the entire area of the socket cells.

202

203 Neurons and sheath cells do not express the patterning gene *wg*

204         Next, we analyzed whether *wg* is expressed in the neurons composing campaniform  
205 sensilla in the pupal wings of *D. guttifer*. We simultaneously detected *wg* transcripts and the  
206 neuronal marker gene expression in the four sensilla, L3-1, L3-2, L3-3, and L5 (Fig 2), where  
207 *wg* is expressed at a high level. We found that the signals of Elav protein localized in  
208 neuronal nuclei (Fig. 2A-D) and *wg* transcripts (Fig. 2A'-D') were not colocalized within the  
209 four campaniform sensilla (Fig. 2A''-D''). In addition, we did not observe colocalization of  
210 Futsch protein, which was localized throughout the neuronal cytoplasm (Fig. 2E-H), and *wg*  
211 transcripts (Fig. 2E'-H') in the four campaniform sensilla (Fig. 2E''-H''). These results  
212 indicate that the patterning gene *wg* is not expressed in the neurons in the campaniform  
213 sensilla.

214         The signal of *wg* transcripts was observed in contact with the tip of the dendrite  
215 labeled with anti-Futsch antibody at the level of detection by light microscopy (Fig. 2E''-  
216 H''). With reference to the structure of a campaniform sensillum (Fig. 1B; Chevalier 1969;  
217 Gullan and Cranston 2014), the relatively large socket and dome cells surround the dendrite.  
218 In contrast, the sheath cell covers the neuron from the inner dendrite to the cell body and  
219 appears not to spread around the tip of the dendrite. In addition, *wg* transcripts appeared to be  
220 localized in two spots in some images (Fig. 2G', H'), indicating the possibility that two cells  
221 express *wg*. The *wg* expression pattern suggests that *wg* is expressed not in sheath cells but in  
222 either socket cells or dome cells, or both.

223

224 Both socket and dome cells express the patterning gene *wg*

225         In order to determine whether socket and/or dome cells composing campaniform  
226 sensilla express *wg*, we furthermore analyzed the expression pattern of *wg*. As cytoplasmic  
227 markers of sheath, socket and dome cells have not been identified in *D. guttifer*, we labeled  
228 the campaniform sensilla with anti-Na<sup>+</sup>/K<sup>+</sup>-ATPase  $\alpha$  subunit (*Atp $\alpha$* ) antibody (Lebovitz et al.  
229 1989), a marker of the cell membranes. The signals visualized three concentric layers within  
230 the sensilla (Fig 3A). To identify the cell type of each layer, we simultaneously detected  
231 *Su(H)* transcripts, which are expressed in the socket cells in the mechanoreceptor bristles. We

232 found that *Su(H)* signals (Fig. 3B', C') were limited to the outermost layer (Fig 3B'', C''),  
233 indicating that the outermost layer is composed of the socket cell, as shown in Fig 1B.  
234 Although we have not identified the cell types of all of the three layers with specific markers,  
235 based on the cell arrangement shown in Fig 1B, we conclude that the innermost layer is the  
236 neuronal dendrite, the second most is the dome cell, and the outermost is the socket cell.  
237 Among these three concentric layers, we found that *wg* is expressed in the two outer layers,  
238 both socket and dome cells (3D'', D''', E'', E''').

239 This study revealed that *wg* expression which induces pigmentation spots around  
240 campaniform sensilla of *D. guttifer* occurs in the socket and dome cells, but not neurons.  
241 Considering that Wg protein is known to act as a morphogen, it is expected that Wg produced  
242 by these two cells is secreted to the surrounding epidermal cells and induces expression of the  
243 pigmentation genes in the recipient cells. This process of color pattern formation, in which  
244 co-option of the patterning gene occurs in specific cells composing nerve tissues, has not  
245 been reported before.

246 Although it is still unclear what gene regulatory network is responsible for the co-  
247 option of *wg* in these two cell types, a clue was obtained from an abnormal individual of *D.*  
248 *guttifer* (Werner et al. 2010). In the abnormal individual, the dome structure of a  
249 campaniform sensillum in the adult wing was converted to the bristle structure, and the  
250 pigmentation spot was not formed around the structure. Considering our findings,  
251 suppression of the *wg* expression by the fate change of socket and/or dome cells can be  
252 assumed to have been the reason for the abnormality of pigmentation in that individual. This  
253 suggests that we can approach the regulatory process of the spatiotemporal expression of *wg*  
254 by clarifying the state of gene expression underlying the fate change of these two cells.  
255 Furthermore, in *D. melanogaster*, overexpression of the *hindsight* gene in sensory organ  
256 precursors (SOPs) on the future wing vein of the wing disc transformed the dome structure of  
257 some campaniform sensilla to the bristle-like structure (Szablewski and Reed 2019). The  
258 expression of *hindsight* was confirmed in SOPs (Buffin and Gho 2010), and *hindsight*  
259 encodes a transcription factor that is necessary to positively regulate EGFR signaling (Kim et  
260 al. 2020). If the transformation mechanism applies to the reason why the described  
261 abnormality of *D. guttifer* occurred, the expression of *wg* could be under the control of  
262 EGFR signaling, and overactivation of the signaling could downregulate the *wg* expression.  
263 In order to confirm whether EGFR signaling influences the spatiotemporal expression of *wg*  
264 in socket and dome cells, it will be necessary to investigate whether the spot formation of *D.*



265 *guttifera* is influenced by manipulating the expression of genes involved in EGFR signaling,  
266 such as *hindsight*.

267

## 268 **Acknowledgements**

269 We thank Elizabeth Nakajima for English editing, and Yuichi Fukutomi and Tomohiro  
270 Yanone for technical advice.

271

## 272 **Funding**

273 This work was supported by MEXT/JSPS KAKENHI (18H02486) grant to S. K.

274

## 275 **References**

276 Aigouy B, Van de Bor V, Boeglin M, Giangrande A (2004) Time-lapse and cell ablation  
277 reveal the role of cell interactions in fly glia migration and proliferation. *Development*  
278 131:5127–5138. <https://doi.org/10.1242/dev.01398>

279 Ando T, Matsuda T, Goto K, Hara K, Ito A, Hirata J, Yatomi J, Kajitani R, Okuno M,  
280 Yamaguchi K, Kobayashi M, Takano T, Minakuchi Y, Seki M, Suzuki Y, Yano K, Itoh T,  
281 Shigenobu S, Toyoda A, Niimi T (2018) Repeated inversions within a *pannier* intron drive  
282 diversification of intraspecific colour patterns of ladybird beetles. *Nat Commun* 9:1–13.  
283 <https://doi.org/10.1038/s41467-018-06116-1>

284 Barolo S, Walker RG, Polyanovsky AD, Freschi G, Keil T, Posakony JW (2000) A Notch-  
285 independent activity of Suppressor of Hairless is required for normal mechanoreceptor  
286 physiology. *Cell* 103:957–969. [https://doi.org/10.1016/S0092-8674\(00\)00198-7](https://doi.org/10.1016/S0092-8674(00)00198-7)

287 Blochlinger K, Bodmer R, Jan LY, Jan YN (1990) Patterns of expression of *Cut*, a protein  
288 required for external sensory organ development in wild-type and *cut* mutant *Drosophila*  
289 embryos. *Genes Dev* 4:1322–1331. <https://doi.org/10.1101/gad.4.8.1322>

290 Blochlinger K, Jan LY, Jan YN (1993) Postembryonic patterns of expression of *cut*, a locus  
291 regulating sensory organ identity in *Drosophila*. *Development* 117:441–450

292 Buffin E, Gho M (2010) Laser microdissection of sensory organ precursor cells of  
293 *Drosophila* microchaetes. *PLoS One* 5. <https://doi.org/10.1371/journal.pone.0009285>

294 Chevalier RL (1969) The fine structure of campaniform sensilla on the halteres of *Drosophila*  
295 *melanogaster*. *J Morph* 128:443–463. <https://doi.org/10.1002/jmor.1051280405>

296 Cott HB (1940) Adaptive coloration in animals. Methuen, London

297 Dufour, HD, Koshikawa S, Finet C (2020) Temporal flexibility of gene regulatory network  
298 underlies a novel wing pattern in flies. *Proc Natl Acad Sci U S A* 117: 11589–11596 DOI:

- 299 10.1073/pnas.2002092117
- 300 Fukutomi Y, Matsumoto K, Agata K, Funayama N, Koshikawa S, (2017) Pupal development  
301 and pigmentation process of a polka-dotted fruit fly, *Drosophila guttifera* (Insecta,  
302 Diptera). *Dev Genes Evol* 227:171–180. <https://doi.org/10.1007/s00427-017-0578-3>
- 303 Fukutomi Y, Matsumoto K, Funayama N, Koshikawa S (2018) Methods for staging pupal  
304 periods and measurement of wing pigmentation of *Drosophila guttifera*. *J Vis Exp* 131:  
305 e56935. <https://doi.org/10.3791/56935>
- 306 Fukutomi Y, Koshikawa S (2021) Mechanism of color pattern formation in insects. In:  
307 Hashimoto H, Goda M, Futahashi R, Kelsh R, Akiyama T (ed) *Pigments, pigment cells,*  
308 *pigment patterns*. Springer, Singapore
- 309 Fukutomi Y, Kondo S, Toyoda A, Shigenobu S, Koshikawa S (2021) Transcriptome analysis  
310 reveals *wingless* regulates neural development and signaling genes in the region of wing  
311 pigmentation of a polka-dotted fruit fly. *FEBS J* 288:99-110.  
312 <https://doi.org/10.1111/febs.15338>
- 313 Furman D, Bukharina T (2008) How *Drosophila melanogaster* forms its mechanoreceptors.  
314 *Curr Genomics* 9:312–323. <https://doi.org/10.2174/138920208785133271>
- 315 Gautier M, Yamaguchi J, Foucaud J, et al. (2018) The genomic basis of color pattern  
316 polymorphism in the harlequin ladybird. *Curr Biol* 28:3296-3302.e7.  
317 <https://doi.org/10.1016/j.cub.2018.08.023>.
- 318 Gomez-Skarmeta JL, Rodriguez I, Martinez C, Culi J, Ferres-Marco D, Beamonte D,  
319 Modolell J (1995) Cis-regulation of *achaete* and *scute*: Shared enhancer-like elements  
320 drive their coexpression in proneural clusters of the imaginal discs. *Genes Dev* 9:1869–  
321 1882. <https://doi.org/10.1101/gad.9.15.1869>
- 322 Gullan PJ, Cranston PS (2014) *The insects: an outline of entomology*. Wiley, New Jersey
- 323 He CW, Liao CP, Pan CL (2018) Wnt signalling in the development of axon, dendrites and  
324 synapses. *Open Biol* 8. <https://doi.org/10.1098/rsob.180116>
- 325 Hummel T, Krukkert K, Roos J, Davis G, Klämbt C (2000) *Drosophila* Futsch/22C10 is a  
326 MAP1B-like protein required for dendritic and axonal development. *Neuron* 26:357–370.  
327 [https://doi.org/10.1016/S0896-6273\(00\)81169-1](https://doi.org/10.1016/S0896-6273(00)81169-1)
- 328 Jiggins CD, Wallbank RWR, Hanly JJ (2017) Waiting in the wings: What can we learn about  
329 gene co-option from the diversification of butterfly wing patterns? *Philos Trans R Soc B*  
330 *Biol Sci* 372. <https://doi.org/10.1098/rstb.2015.0485>
- 331 Kim M, Du OY, Whitney RJ, Wilk R, Hu J, Krause HM, Kavalier J, Reed BH (2020) A  
332 functional analysis of the *Drosophila* gene *hindsight*: Evidence for positive regulation of

- 333 EGFR signaling. *G3 Genes, Genomes, Genet* 10:117–127.  
334 <https://doi.org/10.1534/g3.119.40082>
- 335 Koshikawa S (2020) Evolution of wing pigmentation in *Drosophila*: Diversity, physiological  
336 regulation, and cis-regulatory evolution. *Dev Growth Differ* 62:269–278.  
337 <https://doi.org/10.1111/dgd.12661>
- 338 Koshikawa S, Fukutomi Y, Matsumoto K (2017) *Drosophila guttifera* as a model system for  
339 unraveling color pattern formation. In: Sekimura T, Nijhout HF (ed) Diversity and  
340 evolution of butterfly wing patterns. Springer, Singapore, pp 287-301.  
341 [https://doi.org/10.1007/978-981-10-4956-9\\_16](https://doi.org/10.1007/978-981-10-4956-9_16)
- 342 Koshikawa S, Giorgianni MW, Vaccaro K, Kassner VA, Yoder JH, Werner T, Carroll SB  
343 (2015) Gain of cis-regulatory activities underlies novel domains of wingless gene  
344 expression in *Drosophila*. *Proc Natl Acad Sci U S A* 112:7524–7529.  
345 <https://doi.org/10.1073/pnas.1509022112>
- 346 Lauter G, Söll I, Hauptmann G (2011) Two-color fluorescent in situ hybridization in the  
347 embryonic zebrafish brain using differential detection systems. *BMC Dev Biol* 11.  
348 <https://doi.org/10.1186/1471-213X-11-43>
- 349 Lebovitz RM, Takeyasu K, Fambrough DM (1989) Molecular characterization and  
350 expression of the (Na<sup>+</sup> + K<sup>+</sup>)-ATPase alpha-subunit in *Drosophila melanogaster*. *EMBO*  
351 *J* 8:193–202. <https://doi.org/10.1002/j.1460-2075.1989.tb03364.x>
- 352 Nagaso H, Murata T, Day N, Yokoyama KK (2001) Simultaneous detection of RNA and  
353 protein by in situ hybridization and immunological staining. *J Histochem Cytochem*  
354 49:1177–1182. <https://doi.org/10.1177/002215540104900911>
- 355 Martin A, McCulloch KJ, Patel NH, Briscoe AD, Gilbert LE, Reed RD (2014) Multiple  
356 recent co-options of Optix associated with novel traits in adaptive butterfly wing  
357 radiations. *EvoDevo* 5:7 <https://doi.org/10.1186/2041-9139-5-7>
- 358 Martin A, Papa R, Nadeau NJ, Hill RI, Counterman BA, Halder G, Jiggins CD, Kronforst  
359 MR, Long AD, McMillan WO, Reed RD (2012) Diversification of complex butterfly wing  
360 patterns by repeated regulatory evolution of a *Wnt* ligand. *Proc Natl Acad Sci U S A*  
361 109:12632–12637. <https://doi.org/10.1073/pnas.1204800109>
- 362 Martin A, Reed RD (2014) *Wnt* signaling underlies evolution and development of the  
363 butterfly wing pattern symmetry systems. *Dev Biol* 395:367–378.  
364 <https://doi.org/10.1016/j.ydbio.2014.08.031>

- 365 Massey J, Wittkopp PJ (2016) The genetic basis of pigmentation differences within and  
366 between *Drosophila* species. *Curr Top Dev Biol* 119:27–61.  
367 <https://doi.org/10.1016/bs.ctdb.2016.03.004>.
- 368 Mazo-Vargas A, Concha C, Livraghi L et al (2017) Macroevolutionary shifts of *WntA*  
369 function potentiate butterfly wing-pattern diversity. *Proc Natl Acad Sci U S A* 114:10701–  
370 10706. <https://doi.org/10.1073/pnas.1708149114>
- 371 Packard M, Koo ES, Gorczyca M, Sharpe J, Cumberledge S, Budnik V (2002) The  
372 *Drosophila* Wnt, wingless, provides an essential signal for pre- and postsynaptic  
373 differentiation. *Cell* 111:319–330. [https://doi.org/10.1016/S0092-8674\(02\)01047-4](https://doi.org/10.1016/S0092-8674(02)01047-4)
- 374 Reed RD, Papa R, Martin A, Hines HM, Counterman BA, Pardo-Diaz C, Jiggins CD,  
375 Chamberlain NL, Kronforst MR, Chen R, Halder G, Nijhout HF, Mcmillan WO (2011)  
376 *optix* drives the repeated convergent evolution of butterfly wing pattern mimicry. *Science*  
377 333:1137–1141
- 378 Robinow S, White K (1988) The locus *elav* of *Drosophila melanogaster* is expressed in  
379 neurons at all developmental stages. *Dev Biol* 126:294–303. [https://doi.org/10.1016/0012-1606\(88\)90139-X](https://doi.org/10.1016/0012-1606(88)90139-X)
- 381 Schindelin J, Arganda-Carreras I, Frise E, et al (2012) Fiji: An open-source platform for  
382 biological-image analysis. *Nat Methods* 9:676–682. <https://doi.org/10.1038/nmeth.2019>
- 383 Sturtevant AH (1921) The north American species of *Drosophila* (No. 301). Carnegie  
384 institution, Washington
- 385 Sturtevant, MA, Roark M, Bier E (1993) The *Drosophila rhomboid* gene mediates the  
386 localized formation of wing veins and interacts genetically with components of the EGF-R  
387 signaling pathway. *Genes Dev* 7:961–973. <https://doi.org/10.1101/gad.7.6.961>
- 388 Szablewski K, Reed B (2019) Overexpression of hindsight in sensory organ precursors is  
389 associated with a transformation of campaniform sensilla to microchaetae in the  
390 *Drosophila* wing. *MicroPubl Biol*. <https://doi.org/10.17912/micropub.biology.000103>.
- 391 Tuthill JC, Wilson RI (2016) Mechanosensation and adaptive motor control in insects. *Curr*  
392 *Biol* 26:R1022–R1038. <https://doi.org/10.1016/j.cub.2016.06.070>
- 393 Van De Bor V, Giangrande A (2001) Notch signaling represses the glial fate in fly PNS.  
394 *Development* 128:1381–1390
- 395 Van De Bor V, Walther R, Giangrande A (2000) Some fly sensory organs are gliogenic and  
396 require glide/gcm in a precursor that divides symmetrically and produces glial cells.  
397 *Development* 127:3735–3743

- 398 Werner T, Koshikawa S, Williams TM, Carroll SB (2010) Generation of a novel wing colour  
399 pattern by the Wingless morphogen. *Nature* 464:1143–1148.  
400 <https://doi.org/10.1038/nature08896>
- 401 Werner T, Steenwinkel T, Jaenike J (2020) *The encyclopedia of North American*  
402 *Drosophilids Volume 1: Drosophilids of the Midwest and Northeast*, Michigan  
403 Technological University, Houghton.
- 404 Wittkopp PJ, True JR, Carroll SB (2002) Reciprocal functions of the *Drosophila* Yellow and  
405 Ebony proteins in the development and evolution of pigment patterns. *Development*  
406 129:1849–1858
- 407 Zhang L, Mazo-Vargas A, Reed RD (2017) Single master regulatory gene coordinates the  
408 evolution and development of butterfly color and iridescence. *Proc Natl Acad Sci U S A*  
409 114:10707–10712. <https://doi.org/10.1073/pnas.1709058114>

410 **Figure legends**

411

412 Figure 1. Expression patterns of *wingless* (*wg*) and developmental marker genes in pupal  
413 wings. Transcripts were visualized by *in situ* hybridization using Fast Red, and proteins were  
414 visualized by immunostaining with Alexa555. **A** An adult wing of *D. guttifera*; arrowheads  
415 indicate the pigmentation around campaniform sensilla. **B** Transverse section diagram of  
416 campaniform sensillum (After Gullan and Cranston, 2014). **C** Expression pattern of the  
417 patterning gene *wg* in a pupal wing of *D. guttifera*; arrowheads indicate the expression at  
418 campaniform sensilla. **D and D'** Localization of Cut protein in *D. melanogaster*. **E and E'**  
419 Localization of Cut protein in *D. guttifera*. Cut was observed in nuclei of all cells composing  
420 campaniform sensilla in both species. Arrowheads indicate the nuclei. **F** Localization of  
421 Futsch protein in *D. melanogaster*. **G** Localization of Futsch protein in *D. guttifera*. Futsch  
422 was observed in cytoplasm of neurons in both species. **H** Localization of Elav (Embryonic  
423 lethal abnormal vision) protein in *D. melanogaster*. **I** Localization of Elav protein in *D.*  
424 *guttifera*. Elav protein was observed in nuclei of neurons in both species. **J** Localization of  
425 *Suppressor of Hairless* [*Su(H)*] transcripts in *D. melanogaster*. **K** Localization of *Su(H)*  
426 transcripts in *D. guttifera*. *Su(H)* transcripts were observed in socket cells in both species.  
427 Scale bar indicates 100  $\mu\text{m}$  (**A, B, D-K**) or 5  $\mu\text{m}$  (**D', E'**). Distal is to the right.

428

429 Figure 2. The patterning gene *wingless* (*wg*) is not expressed in neurons of campaniform  
430 sensilla. Signals of Elav (Embryonic lethal abnormal vision) protein (**A, B, C, D**) localized in  
431 neuronal nuclei were compared with those of *wg* transcripts (**A', B', C', D'**). Signals of Elav  
432 did not overlap with those of *wg* (**A'', B'', C'', D''**). Signals of Futsch protein (**E, F, G, H**)  
433 localized in neuronal cytoplasm compared with those of *wg* transcripts (**E', F', G', H'**).  
434 Arrows indicate the cell bodies and arrowheads indicate the dendrites. Signals of Futsch did  
435 not overlap with signals of *wg* (**E'', F'', G'', H''**). Scale bar indicates 5  $\mu\text{m}$ . Distal is to the  
436 right. Elav and Futsch proteins were visualized by immunostaining with Alexa488. *wg*  
437 transcripts were visualized by *in situ* hybridization using Fast Red.

438

439 Figure 3. *wg* transcripts were observed in the socket and dome cells. The signal of  $\text{Na}^+/\text{K}^+$ -  
440 ATPase ( $\text{Atp}\alpha$ , green in the figures) visualizes the cell membrane at campaniform sensilla  
441 (**A, B, C, D**). *Suppressor of Hairless* [*Su(H)*, magenta in the second left and third left figures]  
442 transcripts were detected at campaniform sensilla (**B', C'**). Cell types can be identified  
443 according to their morphology and relative position. The relatively large cell surrounding the

444 other structures of the campaniform sensillum and expressing *Su(H)* transcripts was identified  
445 as a socket cell (**A'**, **B''**, **B'''**, **C''**, **C'''**). The cell surrounded by a socket cell was identified  
446 as a dome cell. The sheath cell was not obvious in this plane, while the dendrite surrounded  
447 by a sheath cell was visible. *wg* transcripts (**C'**, **D'**) were localized in the socket cell and the  
448 inner dome cell (**C''**, **C'''**, **D''**, **D'''**). All panels show L3-1 sensillum. Scale bar indicates 1  
449  $\mu\text{m}$ . Atp $\alpha$  protein was visualized by immunostaining with Alexa488. *wg* and *Su(H)*  
450 transcripts were visualized by *in situ* hybridization using Fast Red.

**Fig.1**

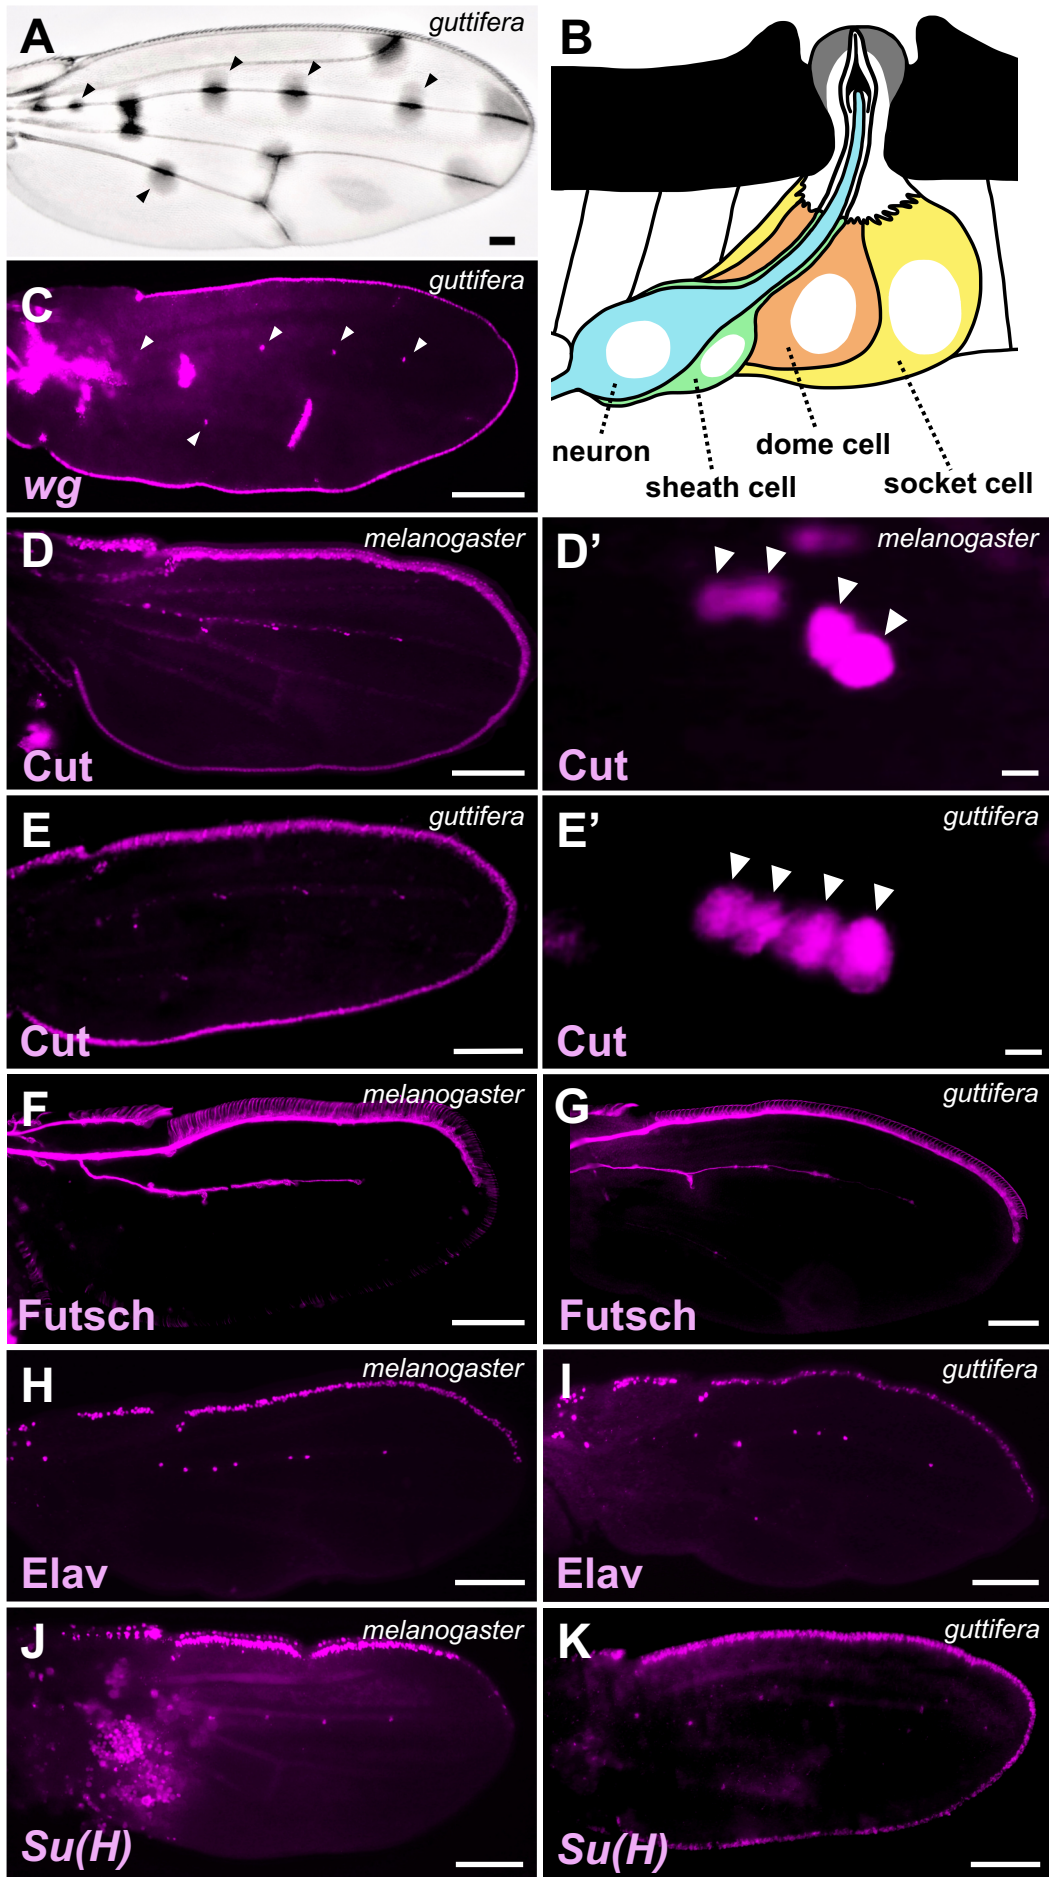



Fig.2

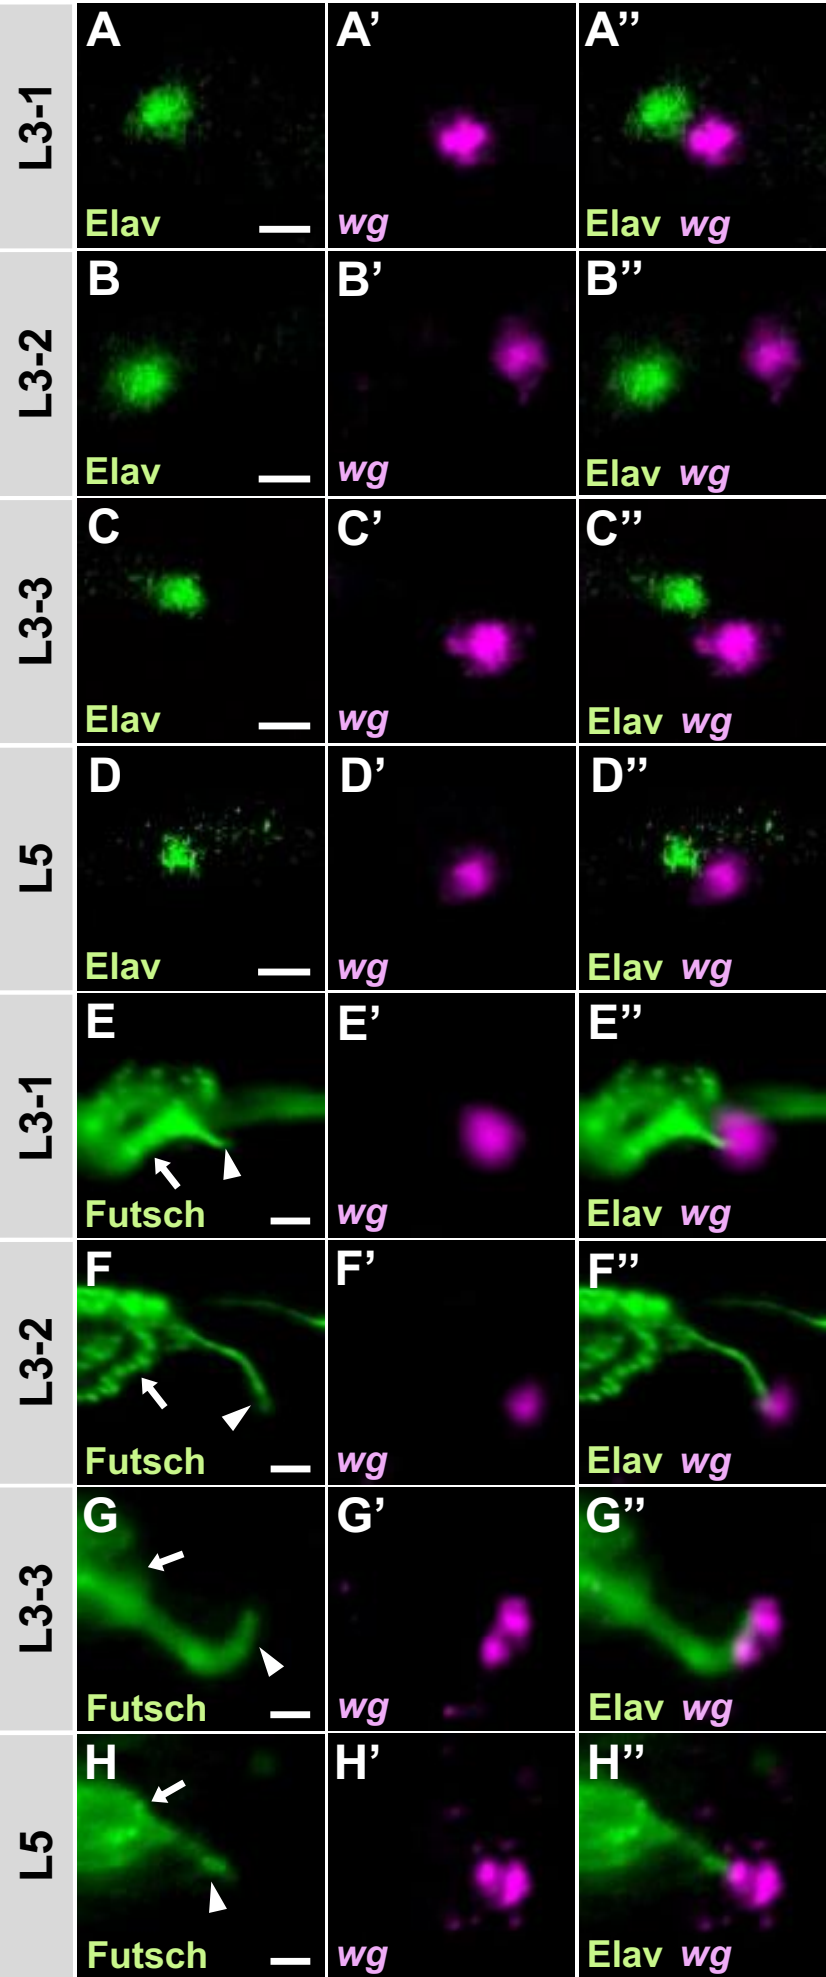

**Fig.3**

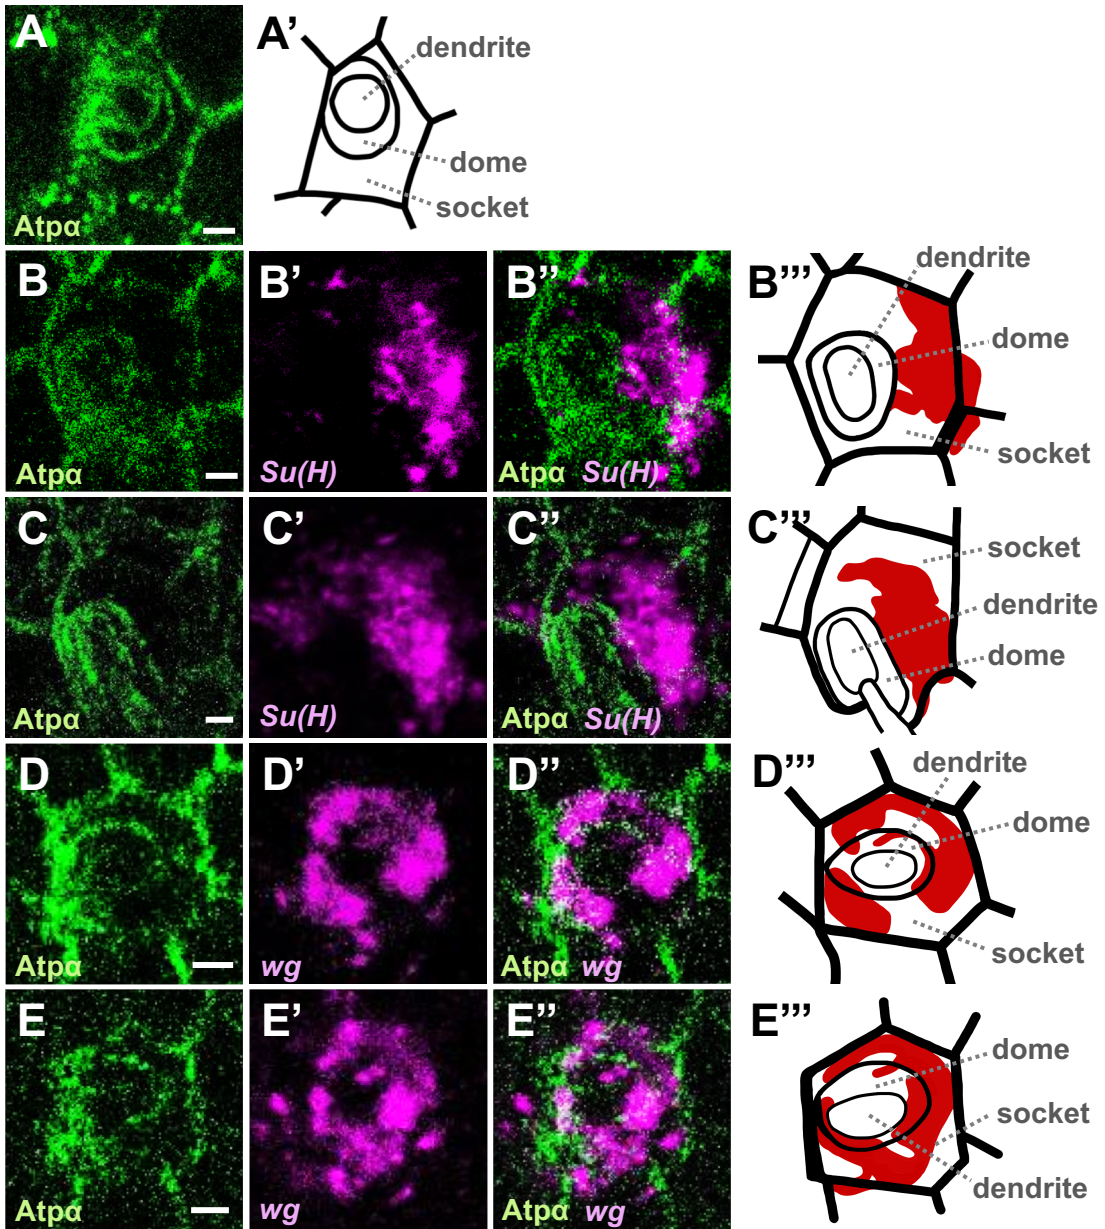

Source: https://www.biorxiv.org/content/10.1101/2021.02.01.429284v1.full.pdf
